# Supplementary material
Source: Elsevier journal article supplement (https://www.sciencedirect.com/science/article/pii/S0001731021002751)
Supplement: mmc1 [file S0001731021002751:mmc1.doc]

# APPENDIX

**A1.** EQ-5D questionnaire results per visit

|  | **Baseline**  **visit n (%)** | **3 months visit** **n (%)** | **6 months visit** **n (%)** | **12 months visit n (%)** |
| --- | --- | --- | --- | --- |
| **EQ-5D** | | | | |
| **Mobility**, n (%) | | | | |
| I have no problems in walking about | 296 (82.0) | 268 (74.2) | 244 (67.6) | 214 (59.3) |
| I have some problems in walking about | 60 (16.6) | 48 (13.3) | 54 (15.0) | 50 (13.9) |
| I am unable to walk about in walking about | 1 (0.3) | 1 (0.3) | 2 (0.6) | 2 (0.6) |
| Not available | 4 (1.1) | 44 (12.2) | 61 (16.9) | 95 (26.3) |
| **Self-care**, n (%) | | | | |
| I have no problems with self-care | 340 (94.2) | 302 (83.7) | 284 (78.7) | 248 (68.7) |
| I have some problems washing or dressing myself | 15 (4.2) | 16 (4.4) | 16 (4.4) | 17 (4.7) |
| I am unable to wash or dress myself | 1 (0.3) | 0 (0.0) | 0 (0.0) | 1 (0.3) |
| Not available | 5 (1.4) | 43 (11.9) | 61 (16.9) | 95 (26.3) |
| **Usual activities**, n (%) | | | | |
| I have no problems with performing my usual activities | 267 (74.0) | 249 (69.0) | 234 (64.8) | 199 (55.1) |
| I have some problems with performing my usual activities | 87 (24.1) | 66 (18.3) | 60 (16.6) | 63 (17.5) |
| I am unable to perform my usual activities | 3 (0.8) | 2 (0.6) | 4 (1.1) | 3 (0.8) |
| Not available | 4 (1.1) | 44 (12.2) | 63 (17.5) | 96 (26,6) |
| **Pain/Discomfort**, n (%) | | | | |
| I have no pain or discomfort | 145 (40.2) | 165 (45.7) | 167 (46.3) | 158 (43.8) |
| I have some pain or discomfort | 184 (51.0) | 129 (35.7) | 115 (31.9) | 92 (25.5) |
| I have moderate pain or discomfort | 28 (7.8) | 24 (6.7) | 17 (4.7) | 15 (4.2) |
| Not available | 4 (1.1) | 43 (11.9) | 62 (17.2) | 96 (26.6) |
| **Anxiety/Depression**, n (%) | | | | |
| I am not anxious or depressed | 178 (49.3) | 183 (50.7) | 172 (47.7) | 169 (46.8) |
| I am moderately anxious or depressed | 153 (42.4) | 114 (31.6) | 116 (32.1) | 88 (24.4) |
| I am extremely anxious or depressed | 26 (7.2) | 20 (5.5) | 11 (3.1) | 9 (2.5) |
| Not available | 4 (1.1) | 44 (12.2) | 62 (17.2) | 95 (26.3) |
| **VAS***, mean (SD) | 68.4 (20.4) | 72.3 (18.2) | 71.6 (19.3) | 73.6 (19.6) |
| **Index Score**¥, mean (SD) | 0.8 (0.2) | 0.8 (0.2) | 0.8 (0.2) | 0.8 (0.2) |

Evaluable population (N=361).

*VAS from 0 to 100, where 0 is the worst health state imaginable and 100 is the best possible state of health.

¥Index Score value oscillates between 1 (better state of health) and 0 (death).

Abbreviations: EQ-5D, EuroQol-5 dimensions; SD, standard deviation; VAS, Visual Analogue Scale.

**A2.** Centers and investigators that have collaborated in the UCREX study

| **Hospital** | **Department** | **Investigator** |
| --- | --- | --- |
| Hospital Universitari Vall d’Hebron | Allergy | MOISES LABRADOR HORRILLO |
| Hospital del Tórax | Allergy | RUPERTO GONZALEZ PEREZ |
| Hospital Universitario de Burgos | Allergy | FERNANDO GARCIA GONZALEZ |
| Hospital General de Alicante | Dermatology | JUAN FRANCISCO SILVESTRE SALVADOR |
| Hospital Universitario Virgen Macarena | Dermatology | BEGOÑA GARCIA BRAVO |
| Hospital Universitari Doctor Peset | Allergy | CARMEN PEREZ FRANCES |
| Hospital de Sant Joan Despí Moisès Broggi | Dermatology | DAVID VIDAL SARRÓ |
| Hospital Regional Universitario Carlos Haya | Allergy | PALOMA CAMPO MOZO |
| Hospital Universitari i Politècnic La Fe | Dermatology | MERCEDES RODRIGUEZ SERNA |
| Hospital General Universitario Gregorio Marañón | Dermatology | RICARDO SUAREZ FERNANDEZ |
| Hospital Clínic i Provincial de Barcelona | Allergy | JOAN BARTRA TOMAS / ANTONIO VALERO |
| Complejo Hospitalario de Navarra | Allergy | SUSANA ECHECHIPIA MADOZ |
| Hospital del Mar | Dermatology | ANA MARIA GIMENEZ ARNAU |
| Fundación Jiménez Díaz | Allergy | JOAQUIN SASTRE DOMINGUEZ |
| Clínica Universidad de Navarra | Allergy | MARTA FERRER PUGA |
| Hospital Universitari Germans Trias i Pujol | Dermatology | ISABEL BIELSA MARSOL |
| Hospital Clínico Lozano Blesa | Allergy | APOLINAR LEZAUN |
| Complejo Hospitalario Universitario A Coruña | Allergy | BEATRIZ VELEIRO PEREZ |
| Hospital General Universitario Gregorio Marañón | Allergy | MARIA LUISA BAEZA OCHOA DE OCARIZ |
| Hospital Universitario 12 de octubre | Dermatology | FRANCISCO JAVIER ORTIZ DE FRUTOS |
| Hospital de Basurto | Allergy | IGNACIO JAUREGUI PRESA |
| Hospital Universitari Joan XXIII | Allergy | PERE GAIG JANE |
| Hospital Universitario Fundación de Alcorcón | Dermatology | ENRIQUE GOMEZ DE LA FUENTE |
| Hospital Monte Naranco | Allergy | Mª DOLORES QUIÑONES ESTEVEZ |
| Complejo Hospitalario Universitario de Santiago | Dermatology | VIRGINIA FERNANDEZ REDONDO |
| Hospital General de Valencia | Dermatology | VIOLETA ZARAGOZA NINET |
| Hospital General Universitario Santa María del Rosell | Allergy | ALFONSO CARREÑO ROJO |
| Hospital Universitario La Paz | Allergy | MARIA TERESA CABALLERO MOLINA |
| Hospital Arnau de Vilanova | Dermatology | MANUEL VELASCO PASTOR |
| Hospital Clínic i Provincial de Barcelona | Allergy | JOAN BARTRA TOMAS / ANTONIO VALERO |
| Hospital Universitario de La Princesa | Dermatology | DIEGO DE ARGILA FERNANDEZ-DURAN |
| Complejo Hospitalario de Navarra | Dermatology | IGNACIO YANGUAS BAYONA |
| Hospital Universitario Puerto Real | Dermatology | JOSE CARLOS ARMARIO HITA |
| Hospital Universitario Puerta del Mar | Dermatology | MARIO LINARES BARRIOS |
| Hospital General Universitario Morales Messeguer | Dermatology | JOSE MANUEL RODENAS LOPEZ |
| Hospital de la Santa Creu i Sant Pau | Dermatology | ESTHER SERRA BALDRICH |
| Hospital Universitario de Salamanca | Allergy | IGNACIO DAVILA |
| Hospital Santiago Apóstol | Allergy | OLGA VILLARREAL BALZA DE VALLEJO |
| Hospital Universitario de Valme | Dermatology | JERONIMO ESCUDERO ORDOÑEZ |
| Hospital Universitario Virgen del Rocío | Dermatology | JOSE JUAN PEREYRA RODRIGUEZ |
| Hospital Lucus Augusti | Allergy | FRANCISCO CARBALLADA GONZALEZ |
| Hospital de Galdakao | Dermatology | MARIA PILAR MANRIQUE MARTINEZ |
